# Supplementary material for: Circulating HMGB1 in acute ischemic stroke and its association with post-stroke cognitive impairment
Source: PeerJ. 2024 Apr 30;12:e17309. doi: 10.7717/peerj.17309 (PMC11067911; doi:10.7717/peerj.17309)
Supplement: Supplemental Information 1 [file peerj-12-17309-s001.xlsx]

## Sheet: control
	Age, years	Gender	education	SBP, mmHg	DBP, mmHg	FBG, mmol/L	HDL, mmol/L	LDL, mmol/L	Hemoglobin, g/L	Leukocyte, 109/L	MoCA, points	HMGB1, ng/Ml
1	74	male	9	137.6	92.1	6.1	1.4	3.1	126.1	7	27	4.7
2	68	female	9	129.1	93.8	5.8	1.3	3	142.3	6.1	29	3.2
3	57	male	8	139.3	87.6	5.4	1.5	2.2	125.9	7.4	26	5.4
4	54	male	10	137.5	99	5.3	1.4	2.5	130.2	6.1	27	4.5
5	79	male	9	129.9	93.5	7.2	1.4	2.6	117.7	6.1	26	3.8
6	61	female	5	132.4	97.2	6.7	1.5	3.3	117	7.7	28	4.8
7	67	male	10	126.3	86.7	6.3	0.9	2.4	118	6.9	29	5.1
8	52	male	11	132.9	82.6	5	1.1	2.5	124	6	28	4.7
9	80	male	8	140.1	82.4	6	1.1	2.7	140.3	6.4	29	4.7
10	71	male	10	141.5	82.2	7.9	1.7	3	130.3	6.5	29	5.1
11	78	female	10	137	89.7	6.4	1.7	2.7	130.5	7.8	28	5
12	75	male	8	133.2	90.7	5.8	1.1	2	131.1	6.7	28	4.4
13	56	male	9	144.6	95.2	5	1.2	3.1	118	8.7	28	5.1
14	68	female	12	129.4	91.7	5.4	1.3	3	136.5	8.1	26	4.7
15	58	male	7	129.9	83.9	6.9	1.6	2.5	109.8	6.5	28	4.1
16	71	male	10	138	89.5	4.4	0.4	2.4	135.8	6.7	26	4.7
17	69	female	7	135.7	94.1	5.9	0.6	1.9	120.9	6.5	28	4.8
18	63	male	7	126	88.9	4.5	0.9	3.3	121.5	6	28	4.9
19	72	male	10	137.9	92.8	6.8	1.6	1.5	120	7.9	26	4.6
20	74	male	8	124.8	86.4	6.8	1.9	2.3	114	4.6	29	5.2
21	69	female	13	138.1	89.2	4.9	1.8	2.9	144.4	8.4	27	4.4
22	65	male	10	136.6	99.1	5.9	1.7	2.5	135.5	7.5	29	4.4
23	70	male	11	149.7	82.7	6	1.6	3.6	127.8	7.3	26	5.1
24	51	female	11	133.2	94.1	6.4	0.7	3.5	108.8	6	28	4.5
25	73	male	10	145.7	78.2	7.8	1.3	3.3	113	6.8	28	5
26	56	male	9	139.7	86.6	5.9	1.6	0.8	117.3	5.6	28	4.5
27	70	female	9	125.1	91.9	5.2	1.1	2.6	133.9	5.8	26	4.9
28	67	male	7	139.7	96.9	5.9	0.8	2.8	113.9	5.4	28	4.1
29	83	female	10	133.2	95.7	5.5	1.7	2.4	148.8	6.7	28	5
30	62	male	11	134.6	91.3	6.8	1	1.3	121	7	29	5.1
31	61	female	7	135.3	87.2	6.9	1.2	2.8	116.9	7	29	4.8
32	70	male	7	138.3	86.1	6.2	1.4	2.4	131.2	5.9	28	5.2
33	67	female	10	141.9	95.4	6.9	0.9	2.4	131.3	6.4	28	5
34	63	male	10	125	95.9	6.1	1.3	2.9	109.6	5.8	28	4.6
35	70	female	8	145.4	98.9	5.4	0.6	2.7	150.8	7.1	28	4.1
36	69	male	10	141.5	95.1	5.5	1.4	2.7	143.5	7	29	4.7
37	61	male	9	140.2	86.1	5.5	1.1	2.2	135.5	6.4	27	5.1
38	79	male	7	128	95.2	4.8	1.8	2.3	140.3	6.9	27	4.8
39	69	female	11	135.2	91.3	6.7	1.5	2.9	138.4	8.5	26	4.9
40	69	male	10	129.5	89.3	5.8	1	1.7	141.6	6.4	26	4
41	83	male	6	131	83.7	6.8	1	2.8	127.6	7.1	26	3.8
42	62	female	9	140.4	90.2	6.9	0.2	2.8	135.1	6.2	28	5.1
43	69	male	10	132.8	93.7	6.2	1	2.8	120.7	7.4	28	5.2
44	54	male	8	137.6	95.4	6.8	1.1	3	125.7	7.8	28	5.3
45	67	female	8	131.6	96.8	6.1	0.9	3	126	4.5	27	4.1
46	75	male	9	134	81.1	6.2	1.2	1.9	127.5	5.8	28	4.5
47	71	female	8	134.4	96.5	5.8	0.9	2.5	144.8	6.7	28	4.6
48	75	male	11	134.3	103.2	8.2	1	1.9	115.4	5.8	28	4.3
49	69	male	9	141.4	95.1	5.1	0.8	2.3	145.7	6.6	27	4.3
50	65	female	7	133	89.5	6.2	1.2	2.4	150.3	7.7	27	5.2
51	65	male	11	141.4	93.9	5.8	1.1	2.9	127.7	7.3	28	4.1
52	77	male	9	143	94.6	5.7	1.2	2	125.1	5.4	28	4.5
53	61	male	11	137.8	89.6	6	1	3	109.7	5.4	28	5.2
54	82	female	9	139.4	94.8	7.5	1.3	2.8	129.1	7.4	26	4.4
55	53	female	8	142.1	96	6	1.1	2.1	125.1	8.2	26	4.5
56	56	male	12	138.3	86.6	6.8	1.3	2.6	146.8	6.6	27	5.2
57	78	male	10	132.4	86.2	4.3	1.1	2.5	135.8	7.4	26	4.5
58	68	male	10	138.1	96.2	6	1.1	2.4	125.8	5.8	28	5.9
59	76	female	11	132.4	94.4	5.9	1.7	2.8	111.6	7.6	29	4.8
60	64	male	9	133.2	87.4	8.2	1.3	3.2	168.1	8	27	4.9
61	59	female	10	132.9	95.3	5.6	1.2	2.6	134.8	5.4	30	5
62	63	male	11	144	76.5	6.7	1.2	3	141.3	5.8	26	4.1
63	72	female	13	134.7	90.8	6.6	0.7	1.8	141.2	6.6	26	4.4
64	74	male	9	150.4	80.2	6.6	0.7	2.6	114.9	6.7	27	5
65	72	male	9	131.3	94.4	7	1.8	2.2	137.2	6	28	4.9
66	53	male	12	135.6	93.8	7.1	1.4	1.8	162.1	7	28	3.5
67	62	male	10	143.3	86.3	5.5	1.8	3.5	136.8	7	29	4.4
68	58	female	10	130.7	97.2	6.7	1.5	2.6	117.8	6.8	28	3.9
69	89	male	8	140.4	90.9	6.7	1.5	2.5	140	7.1	29	4.8
70	64	male	11	136.2	82.1	4.6	1.3	2.6	122.3	6.7	27	4.8
71	73	male	11	135.3	80.7	6.3	1.3	2.4	100.6	6	28	5.8
72	77	female	9	140.7	84.8	7.3	1.3	2.4	122	5.4	27	4.4
73	65	male	8	131.4	86.4	4.8	1.5	3.2	143.8	6.2	28	4.7
74	71	male	10	149.1	85.6	5.3	1.2	2.3	125.9	5.8	28	4.5
75	74	male	10	139.7	93.8	5.3	1.5	2.4	120.7	6.4	29	4.6
76	62	male	9	138.9	84.8	4.4	1	3.2	123.6	7.4	28	4.2
77	68	male	10	142.9	82.5	5.6	1.7	3.2	119.5	7	29	4.1
78	66	male	13	135.4	93.4	6.4	1.5	3.5	130.5	7.4	29	4.5
79	55	male	6	124.5	83.8	6.4	1.6	2.2	126	6.4	26	4.9
80	83	female	7	128.1	82.8	5.8	1.2	2.3	111.5	7.4	27	5.1
81	77	male	10	133.3	85.5	8	1.3	2.8	122.4	6.8	28	4.7
82	62	male	8	143.2	101.5	5	0.4	2.7	123.8	8	30	4.7
83	84	female	9	144.3	81.5	7.3	1.4	3	144.7	7.8	26	5
84	59	male	10	143.9	87.9	5.7	1.3	2	113.6	6.5	28	3.7
85	69	male	11	140.8	77.9	4.8	1	3	126.4	7.5	28	5.3
86	74	male	6	133.3	102.6	7.1	1.2	1.8	130.4	6.7	28	5.3
87	61	male	10	133.6	95.7	6.2	1.2	2.6	124.6	8.6	27	4.8
88	70	male	11	132.3	103.4	6.6	1.1	2.7	128.5	6.7	27	5
89	65	male	10	128.2	79.9	3.7	1.5	1.6	127.7	6.6	27	5.8
90	72	female	12	131.8	99	5.7	1.1	2.3	132.8	7.5	29	4.7
91	62	male	10	133.7	90.6	5.9	1.4	3.4	123.1	8.4	26	4.4
92	68	male	6	138.2	96.2	6.5	1	1.7	131.1	5.7	27	4.3
93	58	female	11	135.6	86.9	6.1	1.3	2.4	152.7	6.7	28	5.1
94	63	male	9	133.3	95.8	8.2	1.6	2.2	128.9	6.7	28	3.4
95	72	male	8	141.7	84.9	5.1	1	2.4	101	6.4	28	4.5
96	59	male	8	139.2	98.9	4.6	1.1	2.7	148	6.3	27	4.7
97	66	male	10	136.1	90.2	6.8	1	2.1	117.7	7.1	27	4.3
98	64	male	9	138.1	99.9	6.8	0.8	2.5	117.7	7	26	3.7
99	52	female	8	134.2	102	5.6	1.8	2.5	126.7	6.5	28	4.4
100	71	male	8	138.3	80.8	5.8	1	3.4	111.2	5.5	27	4.6
101	70	male	8	139.2	88.8	7.8	1.2	2.8	106.8	7	26	4.1
102	58	male	10	137.4	98.9	4.8	1.2	1.4	132.5	8.9	29	4.5
103	67	male	8	131.8	77	6.6	1.2	2.3	133.5	6.3	27	4.4
104	58	female	9	128.9	82	6.3	1.5	3.5	91	7.1	28	4.5
105	70	male	6	145.2	85.4	6.2	1	2.5	137.8	6.5	27	4.2
106	65	male	12	145.9	76	6.4	1.1	3.1	124.7	6.9	27	4.6
107	59	male	11	127.8	93.4	5.9	0.7	2	115.4	6.4	28	4.4
108	67	female	9	134.7	92.4	6.3	1.4	2.5	167.8	7	28	4.3

## Sheet: PSCI
	Age, years	Gender	education	SBP, mmHg	DBP, mmHg	FBG, mmol/L	HDL, mmol/L	LDL, mmol/L	Hemoglobin, g/L	Leukocyte, 109/L	MoCA, points	HMGB1, ng/Ml
1	66	female	11	139.1	94.1	7	1.3	2.5	125.4	6.5	24	8.8
2	70	male	10	136	80.6	7.2	1	2.9	113.8	6.2	23	5.6
3	66	male	12	132.6	97.2	5	1	3.4	139.7	5.5	23	9.7
4	67	female	9	133.3	100.4	5.9	1.4	2.6	127	6.9	23	8.7
5	61	male	11	133.8	101.2	7.1	1.4	2.1	133.9	7.3	25	9.1
6	67	male	11	129.3	90.7	5.9	1.3	2.2	141.5	6	23	7.4
7	73	female	11	127.1	81.7	7.1	1.3	2.3	126.1	7.7	24	8.8
8	56	male	10	140.2	87.3	6.1	1.3	2.8	116.2	6.8	22	8.6
9	61	male	10	132.8	86.7	5.3	1	3	134.5	6.9	22	9.3
10	56	female	10	134.8	90.5	5.1	1.3	3.2	139	5.7	24	9.6
11	71	male	8	135.9	87.6	6.3	1.4	2.4	140.4	6.2	25	9.6
12	63	female	8	139.6	95.4	5.4	1.3	2.5	124.2	7.3	25	7.2
13	61	male	8	133.5	91.5	5.7	1.2	2	134.3	6.4	25	8.3
14	72	male	10	133.8	97.7	7.3	1.7	2.3	146.9	7	22	9.6
15	76	male	11	133.4	89.7	6.2	1.4	2.3	135	7.2	23	10.8
16	78	female	10	137.2	100	6.2	1.5	1.5	125	6.4	25	7.5
17	65	male	7	142.3	90.5	6.7	1.3	2.2	120.9	6.1	22	9.4
18	78	male	9	134.7	87.5	6.6	1.3	2.7	127.6	7.1	25	8.6
19	70	female	8	135.1	90.1	6.4	1.4	3.3	127.4	6.9	23	9.4
20	75	male	9	123.6	80.1	6.7	1.1	2.4	126.4	6	22	7.6
21	60	male	7	131.7	79.1	6.4	1.4	1.6	120.9	7.2	25	7.9
22	82	female	10	129	78.6	6.4	1	2.2	127.3	7.3	22	9.3
23	80	male	9	134.9	94.3	5.5	1.1	2.9	126.8	7	21	9.8
24	73	male	9	131.3	84	6.7	1.4	2.3	120.7	6.2	23	7.2
25	73	male	11	133.9	84.9	6	1.5	2.6	129.8	8.7	22	9.6
26	76	male	9	134.6	87.8	4.9	1.1	2.7	120	7.6	22	9.3
27	71	male	9	137	90.3	4	0.7	2.9	117.5	7.6	23	7
28	77	female	9	132.2	97.8	7.7	1.5	2.8	136.9	5.8	24	9.7
29	72	female	7	125.9	92.1	7.3	1.4	3	116.3	8	25	8.2
30	58	male	9	139.9	87	6.9	1.3	2.4	126.2	5.7	24	8.6
31	64	female	9	142.1	92.3	5.7	1.5	2	108.6	7.4	22	9.1
32	74	male	10	136.4	79.8	6	1.3	2.3	137.6	7.3	20	8.9
33	76	male	10	134.5	92.7	7.5	1.5	2.5	123.5	7.5	23	8.5
34	83	male	9	140.9	86.7	5.6	1.6	3.4	130.1	7.1	22	7.3
35	62	female	10	141.1	95.5	7.4	1.3	3	125.9	6.8	23	8.2
36	73	male	8	135.5	86.8	6.3	1.2	2.5	110.7	7.3	22	8.9
37	72	male	9	132.6	90.1	5.2	1.3	2.6	120	7.4	25	10
38	60	male	7	134.2	106.7	6.6	1.3	3.1	140.5	7.7	20	7.6
39	69	male	9	135.2	82.5	7	1.1	2.3	135.8	6.4	19	9.6
40	61	male	8	148.3	88.9	7	1.3	2.2	128.8	6.3	20	9
41	66	female	8	146.1	93.6	6.3	1.6	2.6	129.5	6	24	5.4
42	76	male	11	137.7	88.6	4.3	1.2	2	104.3	7.4	24	7.8
43	55	male	12	136.8	86.6	5	1.1	2.7	120.6	6.8	25	8.5
44	72	male	10	132.8	94.4	6.6	1.7	2.4	123.4	6.2	22	9.4
45	78	female	8	143.8	81.7	6.2	1.3	2.2	138.4	6.9	24	9.2
46	75	male	10	134	92.3	6.7	1.5	1.9	135.1	6.6	25	6.5
47	58	male	8	132.6	77.8	6.3	1.1	2.5	121	6.3	24	7.8
48	64	male	9	132.7	84.7	6.3	1	2.2	134.3	7.3	22	7.8
49	57	female	11	144.3	92.8	7.3	0.8	3.1	135.7	8	24	10.5
50	52	male	8	130.1	89.3	5.8	1.2	2.4	145.4	6.8	24	8.8
51	66	female	8	129.8	81.2	7.6	1.4	2.1	125.5	5.5	22	6.9
52	57	female	8	132.6	97	5.5	1.4	2.8	123.7	7	24	8.4
53	70	female	9	146.3	89.6	7.1	1.4	2.7	129	6.7	24	8.9
54	85	male	10	128.4	88.2	6.2	1.3	3	125.2	6.7	21	9.9
55	71	male	7	135.7	93.6	6.6	1.1	2.7	124.5	7	23	8.8
56	66	male	13	131.5	87.4	7.3	1.1	2.2	148.8	7.2	23	7
57	66	female	11	143.1	85.4	5.7	1.2	2.6	145.3	6.6	24	7.2
58	54	male	11	138.5	92.5	7.3	1.4	2.8	132.6	6.7	20	7
59	62	male	8	126.2	92.6	6.4	1.3	2.8	120.7	8.3	22	10.1
60	64	female	12	151.2	84	5.6	1.1	2.5	115.9	7	23	7.6
61	72	male	9	137.1	94	7.2	1.5	2.8	122.2	6.3	25	8.9
62	67	male	9	126.6	86	6.3	1.1	3.3	133.2	7.8	25	11.4
63	65	female	9	135	97.7	5.2	1.2	3	124.6	8.4	25	8.7
64	61	male	9	144	90.5	6.5	1.4	3.3	113.5	6.6	23	9.7
65	55	male	10	144.7	90	6.8	1.3	2.8	118.7	7.2	24	9.2
66	63	female	7	127.7	94.8	7.6	1.3	2.5	105	6.6	23	8.3
67	70	male	8	140.2	78.6	6.7	1.3	2.7	134.7	6.1	25	10
68	64	male	8	129	97.4	6.8	1.2	3	119.1	7.1	24	8.4
69	59	male	10	148.9	86.1	6	1.3	2.6	131.7	5.8	19	9.1
70	71	male	10	133.8	82.9	6.8	1.5	1.8	150.8	6.5	24	6.8
71	64	female	8	140.2	83.2	7.2	1.4	2.3	127.7	6.1	22	9.3
72	62	male	8	135.3	90.2	7.5	1.3	3.6	123.6	6.6	24	8.7
73	66	male	11	131.5	87.5	7.8	1.4	2.5	122.8	6.8	22	9.5
74	69	female	11	147.6	94.4	6	1.5	2.7	133	5.4	23	8.7
75	65	male	8	134.6	91.5	7.4	1.1	2.9	143.5	7.2	22	9.4
76	68	male	9	139.5	90.5	6.9	1.1	2.7	124.1	6.7	21	7.8
77	63	female	10	144.8	90.9	6.3	1.1	1.9	122.1	6.2	21	8.9
78	61	male	10	138.3	90.1	7.2	1.3	2.4	141	6.8	21	8.3
79	65	female	8	144.9	99.4	6.2	1.2	3.2	146.5	7	23	8.5
80	69	male	11	136.1	79.6	6.7	1.3	2.6	116.7	6.6	22	6.7
81	65	female	11	132.1	97	5.9	1.7	3	125.5	7.9	22	7.4
82	57	male	12	132.3	82	6	1.2	3.1	132.7	6	23	8.4
83	60	male	10	134.2	96.5	4.9	1.5	2.5	123.1	5.7	25	8.4
84	59	female	9	136.7	88.3	6.1	1.4	3.1	127.7	7.3	24	6.8
